# Supplementary material for: Systematic Review: Patient and Public Involvement of Children and Young People in Mental Health Research
Source: PubMed Central journal article supplement (PMC10920437; doi:10.1007/s10567-024-00470-x), 2024-02-25

## Reported Barriers to PPI of Children and Young People in Mental Health Research

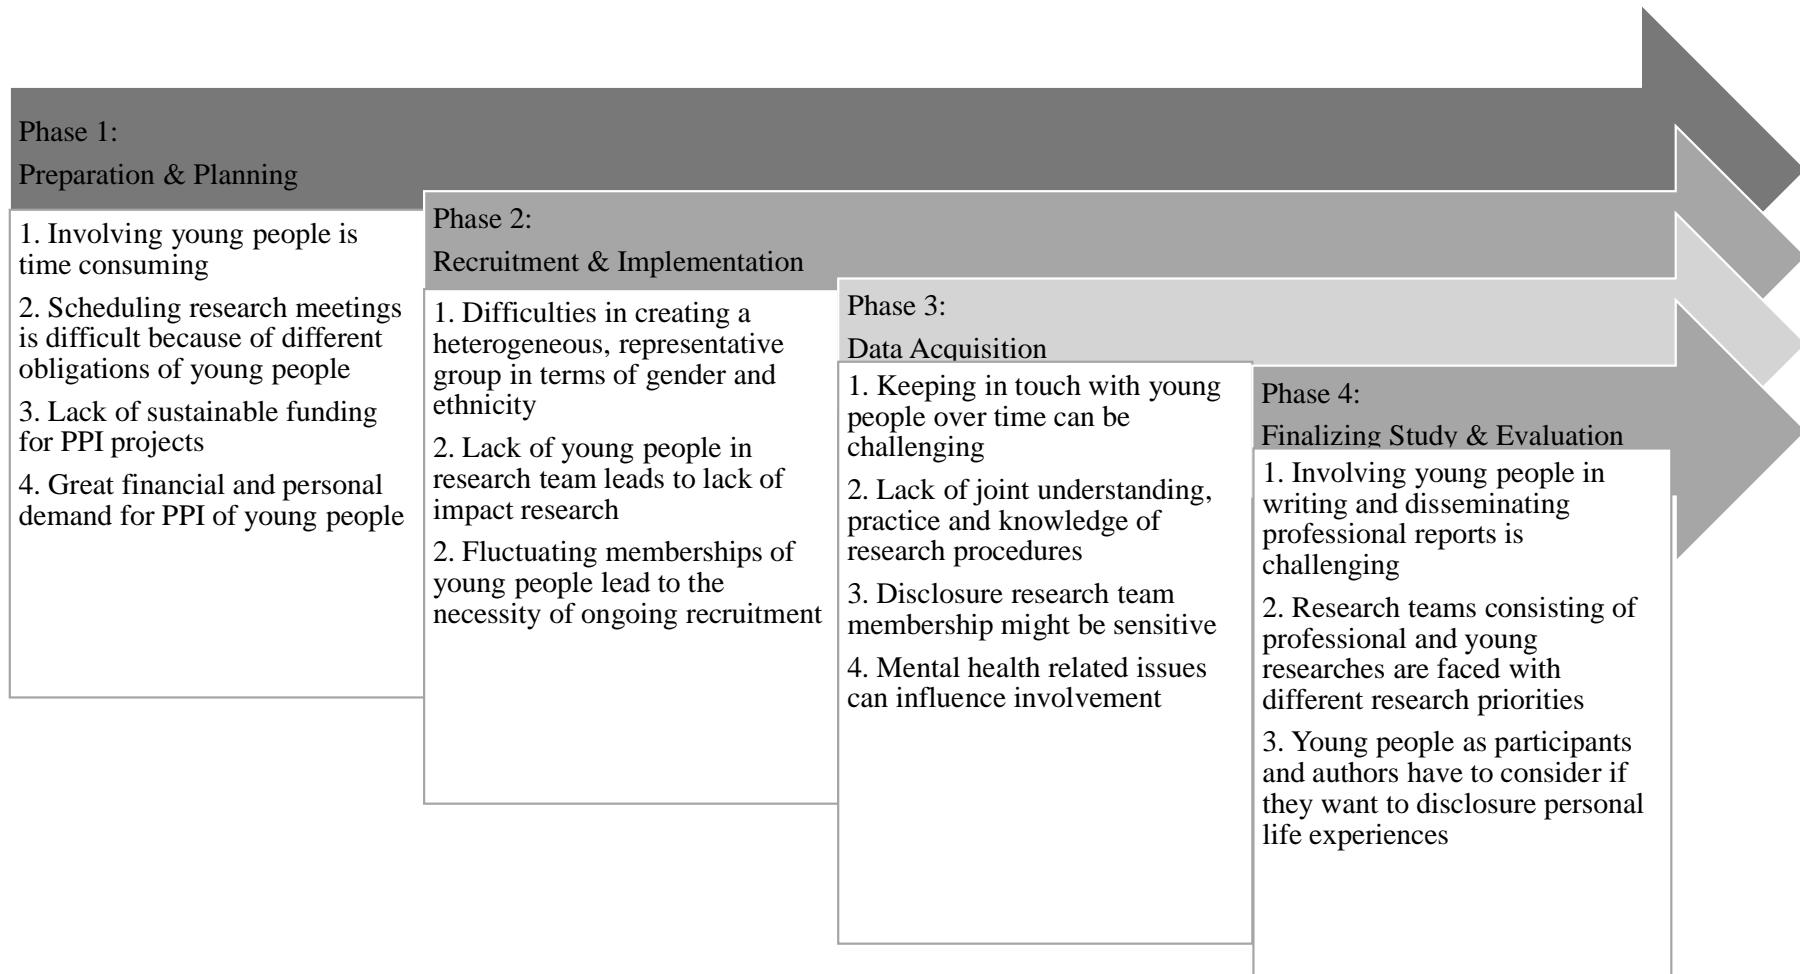

Supplement: 10567_2024_470_MOESM1_ESM.pdf [file 10567_2024_470_MOESM1_ESM.pdf]
